# Supplementary material for: Ferrocenecarboxylic acid: a functional modulator for UiO-66 synthesis and incorporation of Pd nanoparticles
Source: Royal Society of Chemistry journal article supplement (doi:10.1039/c9ce00067d), 2019-01-01
Supplement: c9ce00067d1.pdf [file c9ce00067d1.pdf]

## **Electronic supplementary information**

### **Ferrocenecarboxylic acid: A functional modulator for UiO- 66 synthesis and incorporation of Pd nanoparticles**

Zheng Deng,<sup>a, b</sup> Xinsheng Peng<sup>\*b</sup> and Yu-jia Zeng<sup>\*a</sup>

a: Shenzhen Key Laboratory of Laser Engineering, College of Optoelectronic Engineering,  
Shenzhen University, Shenzhen, 518060, P. R. China.

E-mail: yjzeng@szu.edu.cn

b: State Key Laboratory of Silicon Materials, School of Materials Science and Engineering,  
Zhejiang University, Hangzhou 310027, P.R. China.

E-mail: pengxinsheng@zju.edu.cn.

## 1. Tables

Table S1 Detailed experimental conditions for preparation of UiO-66-Fc with addition of different equiv. of FcCOOH as modulator.

| Runs | ZrCl <sub>4</sub> |      | BDC  |      | FcCOOH |      | FcCOOH/ZrCl <sub>4</sub> | DMF | t  |
|------|-------------------|------|------|------|--------|------|--------------------------|-----|----|
|      | mg                | mmol | mg   | mmol | mg     | mmol | mol/mol                  | mL  | h  |
| 1    | 117.6             | 0.5  | 83.8 | 0.5  | --     | --   | 0                        | 15  | 12 |
| 2    | 116.2             | 0.5  | 83.2 | 0.5  | 115.4  | 0.5  | 1.0                      | 15  | 12 |
| 3    | 118.6             | 0.5  | 83.2 | 0.5  | 231.5  | 1.0  | 2.0                      | 15  | 12 |
| 4    | 116.6             | 0.5  | 83.5 | 0.5  | 690.6  | 3.0  | 6.0                      | 15  | 12 |
| 5    | 117.6             | 0.5  | 83.4 | 0.5  | 1151.2 | 5.0  | 10.0                     | 15  | 12 |

Table S2 Textural properties of UiO-66-Fc synthesized with different addition equivalent of FcCOOH.

| Addition equiv. of FcCOOH | S <sub>BET</sub> (m <sup>2</sup> g <sup>-1</sup> ) | S <sub>Langmuir</sub> (m <sup>2</sup> g <sup>-1</sup> ) | V <sub>micro</sub> (cm <sup>3</sup> g <sup>-1</sup> ) | V <sub>Total</sub> (cm <sup>3</sup> g <sup>-1</sup> ) | Pore size (nm) |
|---------------------------|----------------------------------------------------|---------------------------------------------------------|-------------------------------------------------------|-------------------------------------------------------|----------------|
| 0                         | 485                                                | 729                                                     | 0.22                                                  | 0.30                                                  | 0.51, 0.60     |
| 1                         | 579                                                | 913                                                     | 0.24                                                  | 0.39                                                  | 0.53, 0.59     |
| 2                         | 658                                                | 1060                                                    | 0.26                                                  | 0.48                                                  | 0.51, 0.59     |
| 6                         | 1106                                               | 1774                                                    | 0.47                                                  | 0.85                                                  | 0.54, 0.61     |
| 10                        | 1364                                               | 2206                                                    | 0.56                                                  | 1.21                                                  | 0.53, 0.60     |

Table S3 Content of FcCOOH and Fe/Zr in UiO-66-Fc measured by ICP-AES.

| Addition equiv. of FcCOOH | Content of FcCOOH in UiO-66-Fc |  | Fe/Zr   |
|---------------------------|--------------------------------|--|---------|
|                           | wt%                            |  | mol/mol |
| 0                         | 0                              |  | 0       |
| 1                         | 3.42                           |  | 0.06    |
| 2                         | 5.56                           |  | 0.12    |
| 6                         | 17.90                          |  | 0.37    |
| 10                        | 27.7                           |  | 0.44    |

Table S4 Electrochemical data of UiO-66-Fc synthesized with different FcCOOH/Zr at different scan rate.

| Samples      | $\nu$ | $E_{pa}^a$ | $E_{pc}^b$ | $E_{1/2}^c$ | $\Delta E_p^d$ | $i_{pa}^e$ | $i_{pc}^f$ | $i_{pa}/i_{pc}$ |
|--------------|-------|------------|------------|-------------|----------------|------------|------------|-----------------|
|              | V/s   | V          | V          | V           | V              | $\mu A$    | $\mu A$    |                 |
| FcCOOH/Zr=2  | 0.1   | 0.727      | 0.692      | 0.710       | 0.035          | 0.968      | 0.834      | 1.15            |
|              | 0.2   | 0.744      | 0.686      | 0.715       | 0.058          | 1.595      | 1.447      | 1.10            |
|              | 0.3   | 0.760      | 0.677      | 0.719       | 0.083          | 2.134      | 1.977      | 1.08            |
|              | 0.4   | 0.772      | 0.673      | 0.723       | 0.099          | 2.640      | 2.449      | 1.08            |
|              | 0.5   | 0.772      | 0.668      | 0.720       | 0.104          | 3.099      | 2.907      | 1.07            |
| FcCOOH/Zr=6  | 0.1   | 0.765      | 0.659      | 0.712       | 0.106          | 1.982      | 1.312      | 1.51            |
|              | 0.2   | 0.773      | 0.666      | 0.720       | 0.107          | 2.625      | 1.997      | 1.31            |
|              | 0.3   | 0.779      | 0.664      | 0.722       | 0.115          | 3.210      | 2.589      | 1.24            |
|              | 0.4   | 0.782      | 0.663      | 0.723       | 0.119          | 3.762      | 3.152      | 1.19            |
|              | 0.5   | 0.784      | 0.664      | 0.724       | 0.120          | 4.250      | 3.662      | 1.16            |
| FcCOOH/Zr=10 | 0.1   | 0.763      | 0.663      | 0.713       | 0.100          | 4.013      | 2.377      | 1.67            |
|              | 0.2   | 0.768      | 0.663      | 0.716       | 0.105          | 4.886      | 3.258      | 1.50            |
|              | 0.3   | 0.770      | 0.666      | 0.718       | 0.104          | 5.397      | 3.924      | 1.38            |
|              | 0.4   | 0.776      | 0.666      | 0.721       | 0.110          | 5.951      | 4.490      | 1.33            |
|              | 0.5   | 0.781      | 0.671      | 0.726       | 0.110          | 6.578      | 5.102      | 1.29            |

a:  $E_{pa}$ : Oxidation peak potential

b:  $E_{pc}$ : Reduction peak potential

c: The half wave potential,  $E_{1/2}=(E_{pa}+E_{pc})/2$ .

d: The difference of the oxidation potential and reduction potential,  $\Delta E_p=E_{pa}-E_{pc}$ .

e:  $i_{pa}$ : Oxidation peak current

f:  $i_{pc}$ : Reduction peak current

## 2. Figures

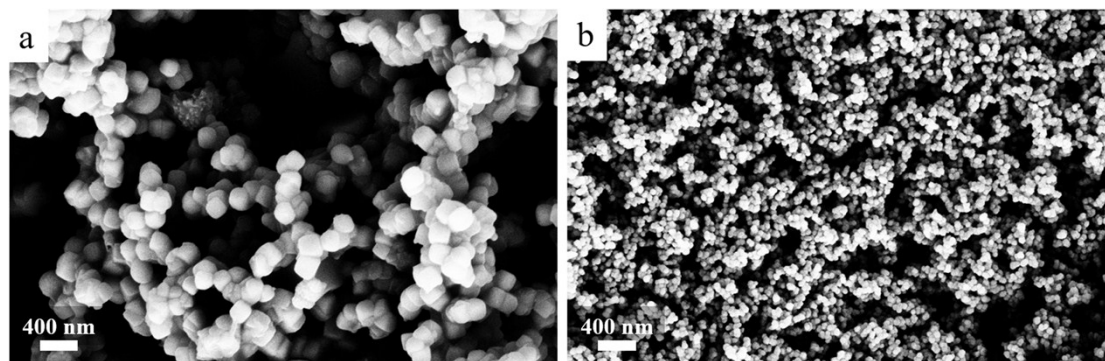

Fig. S1 SEM images of UiO-66 synthesized using 10 equiv. of  $CH_3COOH$  (a) and 10 equiv. of FcCOOH (b) as modulators.

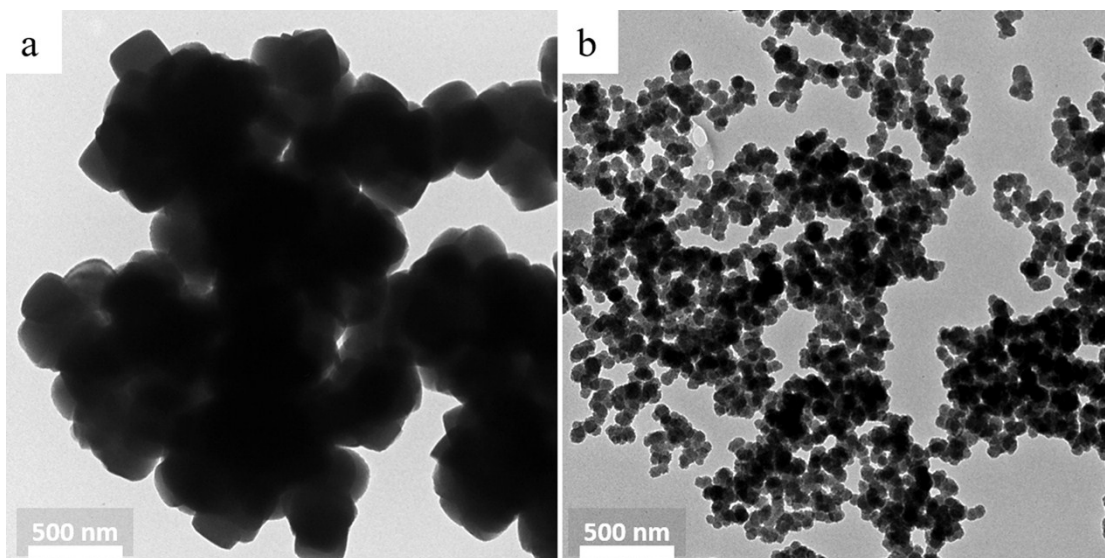

Fig. S2 TEM images of UiO-66 synthesized using 10 equiv. of  $\text{CH}_3\text{COOH}$  (a) and 10 equiv. of  $\text{FcCOOH}$  (b) as modulators.

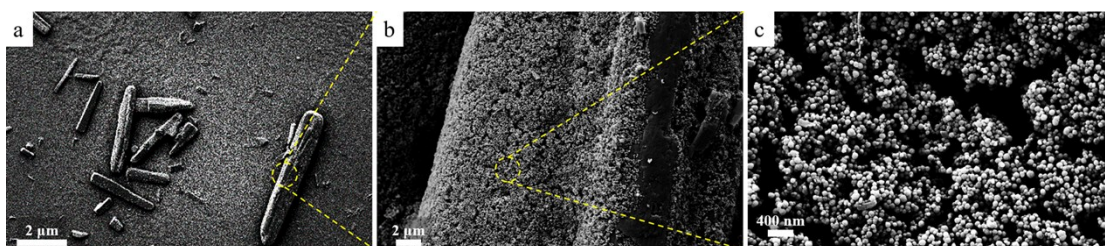

Fig. S3 SEM images (a) and magnified SEM images (b-c) of buck crystals synthesized using 20 equiv. of  $\text{FcCOOH}$  as a modulator.

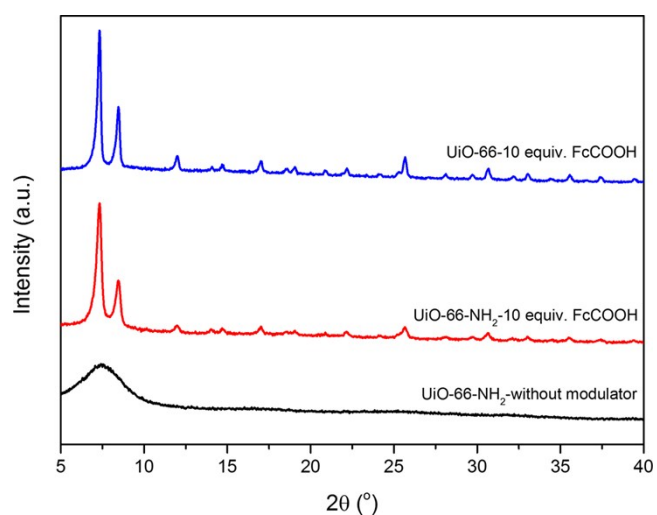

Fig. S4 XRD patterns of  $\text{UiO-66-NH}_2$  without modulator and with addition of 10 equiv. of  $\text{FcCOOH}$  as a modulator.  $\text{UiO-66}$  synthesized with 10 equiv. of  $\text{FcCOOH}$  as a modulator was also listed for comparison.

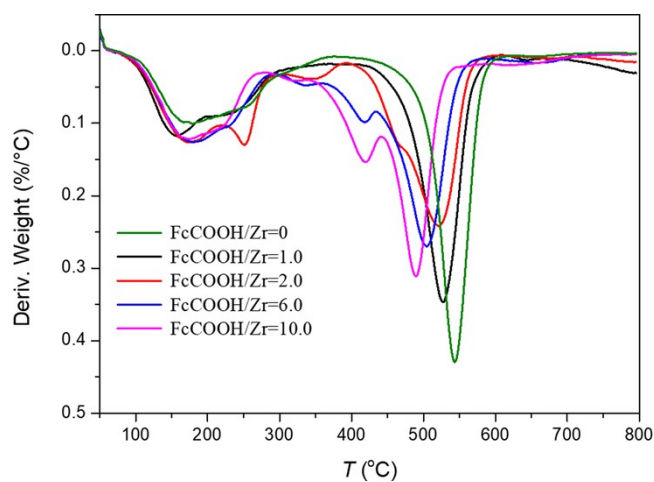

Fig. S5 DTGA curves of UiO-66-Fc synthesized with addition of different equiv. of FcCOOH as a modulator.

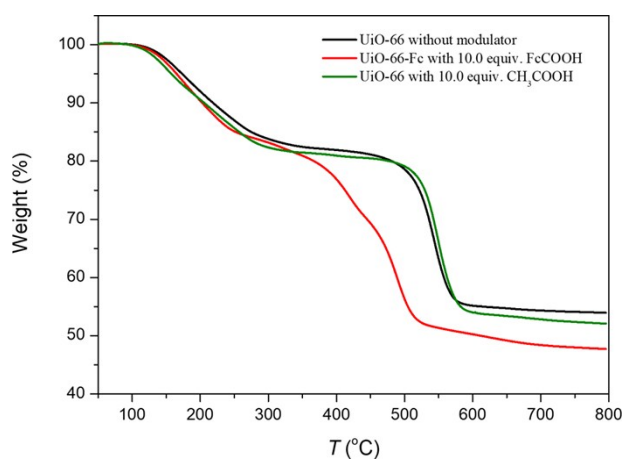

Fig. S6 TGA curves of UiO-66 without addition of modulator and UiO-66 synthesized with addition of 10 equiv. of FcCOOH or CH<sub>3</sub>COOH as a modulator.

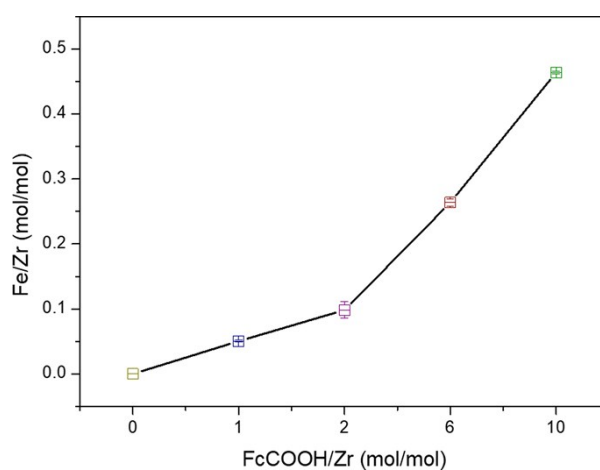

Fig. S7 Calculated Fe/Zr molar ratio of UiO-66-Fc synthesized with addition of different equiv. of FcCOOH as a modulator.

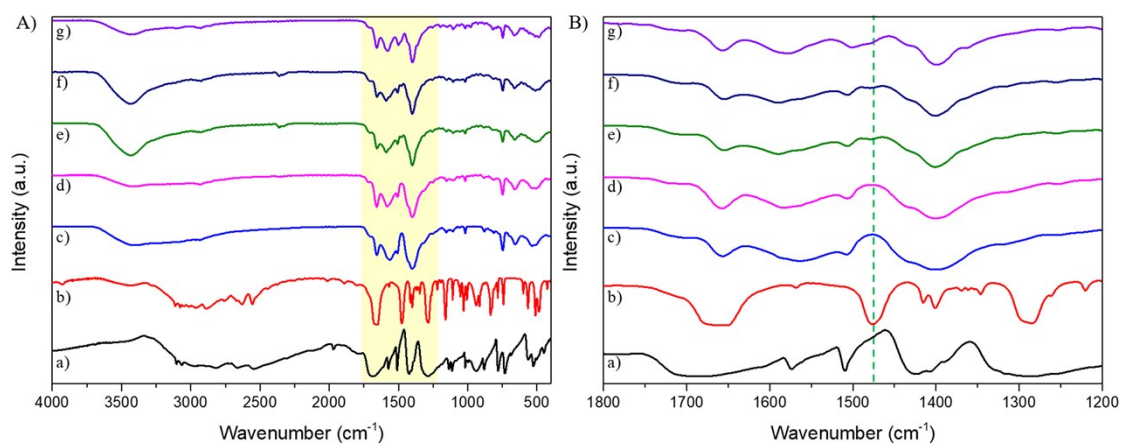

Fig. S8 FT-IR spectra (A) and local magnified FT-IR spectra (B) of a)  $\text{H}_2\text{BDC}$ , b)  $\text{FcCOOH}$ ,  $\text{UiO-66-Fc}$  synthesized with addition of different equiv. of  $\text{FcCOOH}$  as a modulator. c) 0 equiv. d) 1 equiv. e) 2 equiv. f) 6 equiv. and g) 10 equiv.

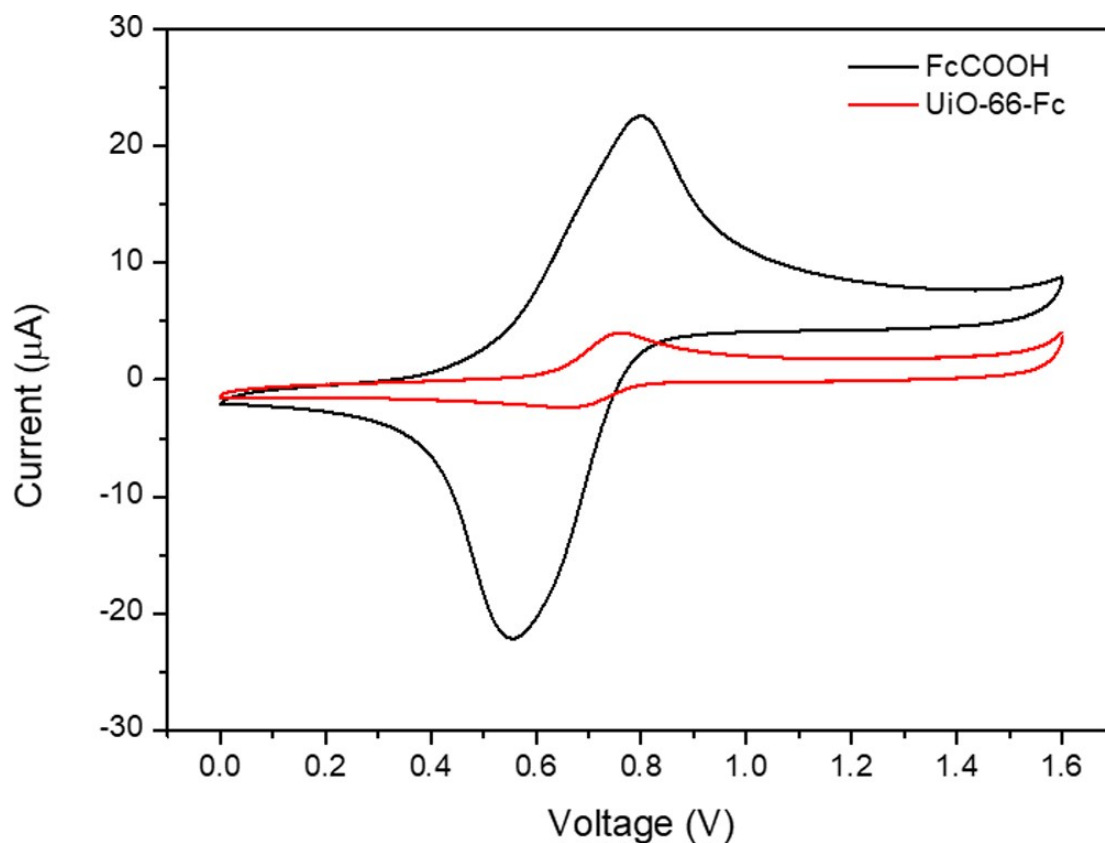

Fig. S9 Cyclic voltammety curves of  $\text{FcCOOH}$  and  $\text{UiO-66-Fc}$  synthesized with addition of 10 equiv. of  $\text{FcCOOH}$  under a scanning rate 0.1 V/s).

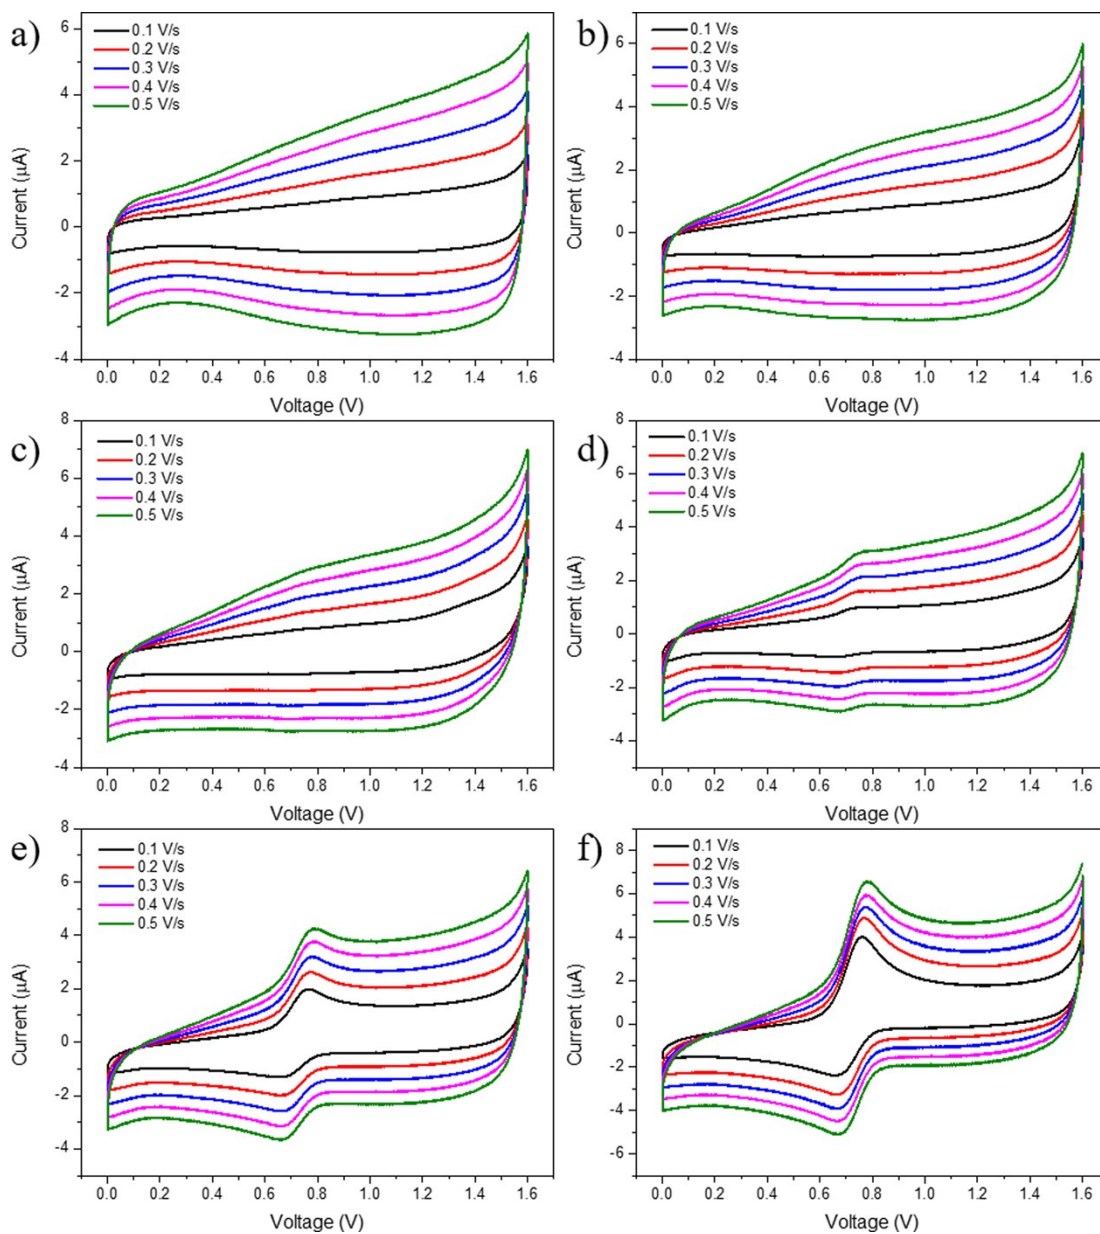

Fig. S10 Cyclic voltammety curves of blank glass carbon electrode (a) and UiO-66-Fc synthesized with addition of different equiv. of FcCOOH modified glass carbon electrode (b-f) under different scanning rate (0.1-0.5 V/s). b) 0 equiv., c) 1 equiv., d) 2 equiv., e) 6 equiv. and f) 10 equiv.

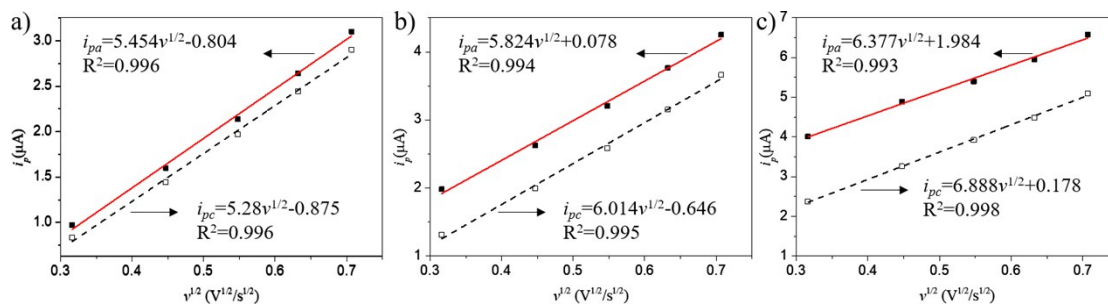

Fig. S11 Relationship between  $i_p$  and  $v^{1/2}$ . a) FcCOOH/Zr=2, b) FcCOOH/Zr=6 and c) FcCOOH/Zr=10.

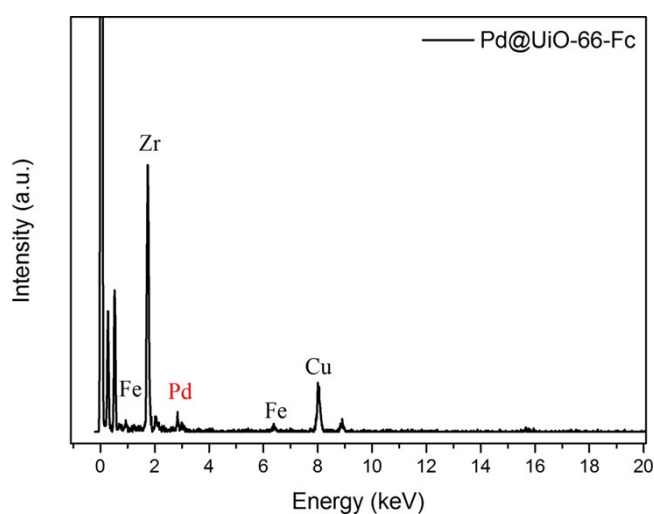

Fig. S12 EDS curve of Pd@UiO-66-Fc. UiO-66-Fc was synthesized with addition of 10 equiv. of FcCOOH as a modulator.

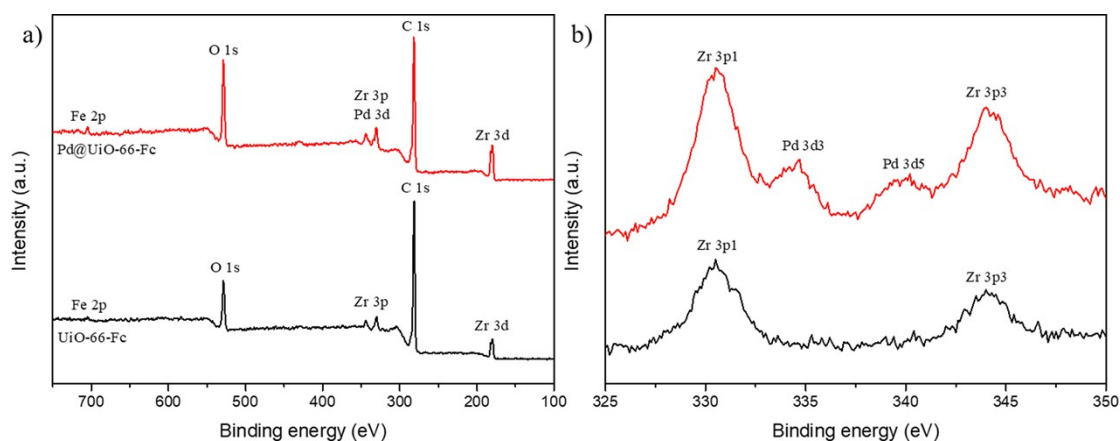

Fig. S13 a) XPS spectra of UiO-66-Fc and Pd@UiO-66-Fc. b) High-resolution XPS Pd 3d and Zr 3p spectra of UiO-66-Fc and Pd@UiO-66-Fc. UiO-66-Fc was synthesized with addition of 10 equiv. of FcCOOH as a modulator.



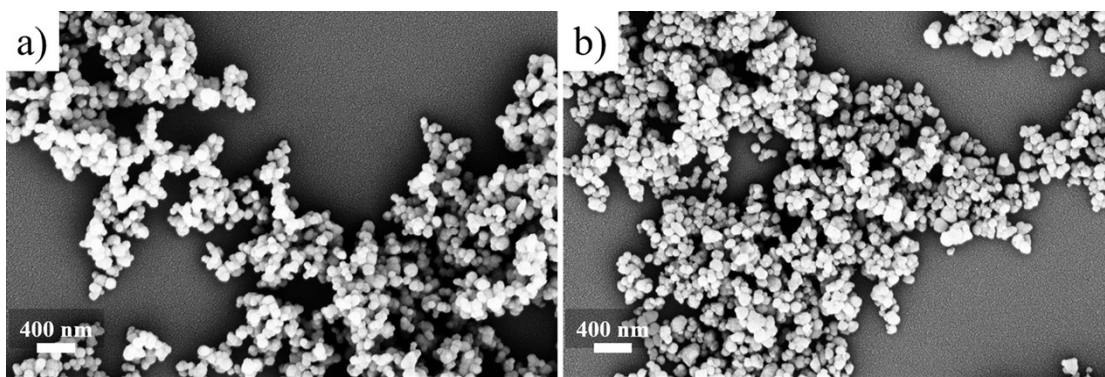

Fig. S14 SEM images of a) UiO-66-Fc and b) Pd@UiO-66-Fc. UiO-66-Fc was synthesized with addition of 10 equiv. of FcCOOH as a modulator.

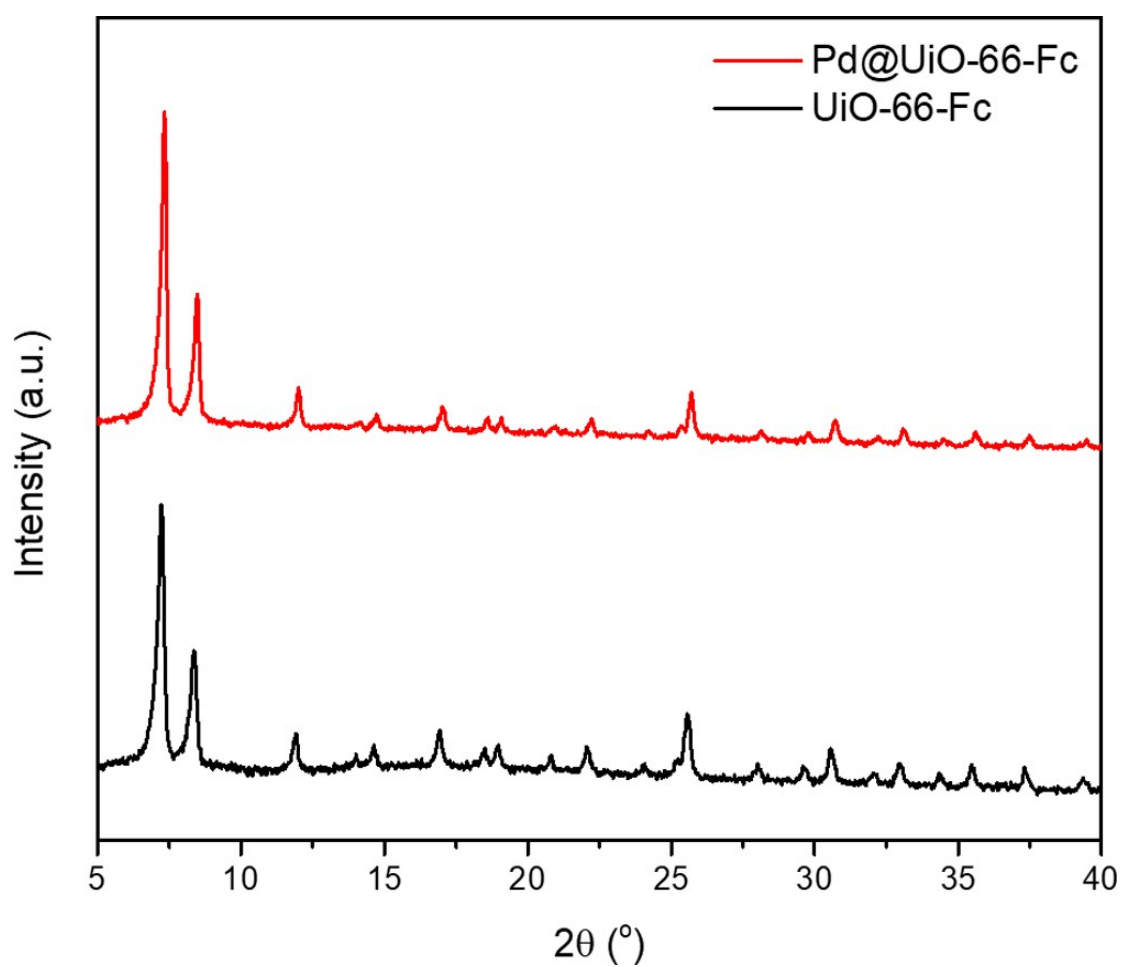

Fig. S15 XRD patterns of Pd@UiO-66-Fc and UiO-66-Fc. UiO-66-Fc was synthesized with addition of 10 equiv. of FcCOOH as a modulator.

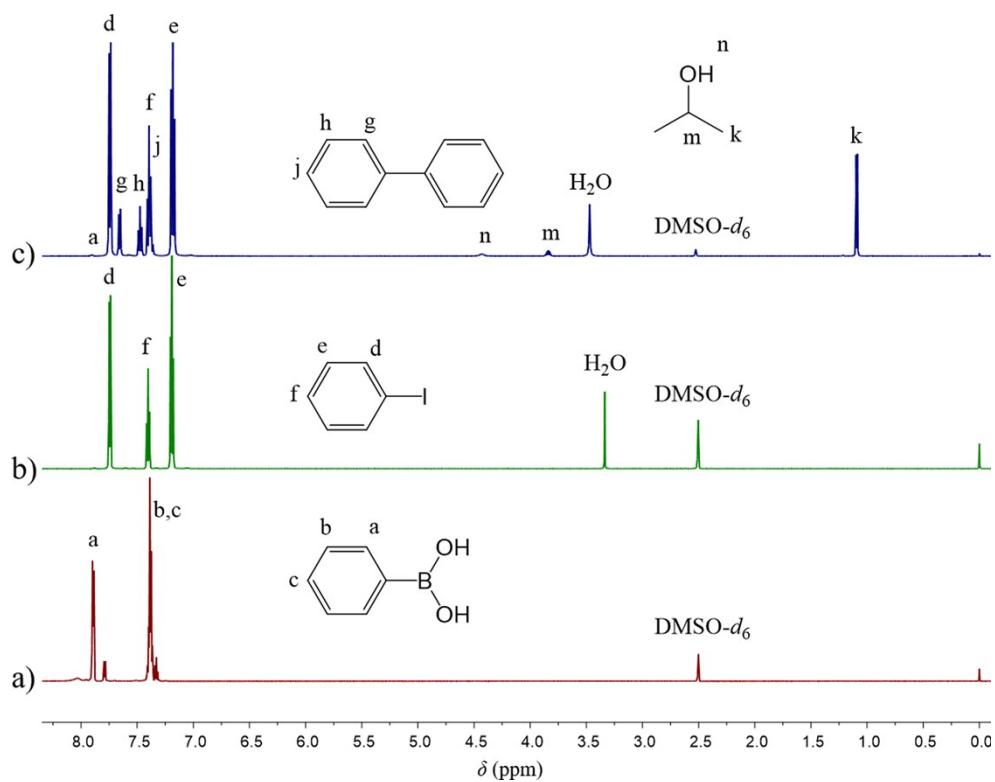

Fig. S16 <sup>1</sup>H NMR spectra of pure phenylboronic acid (a), pure iodobenzene (b) and unpurified reaction product (c).

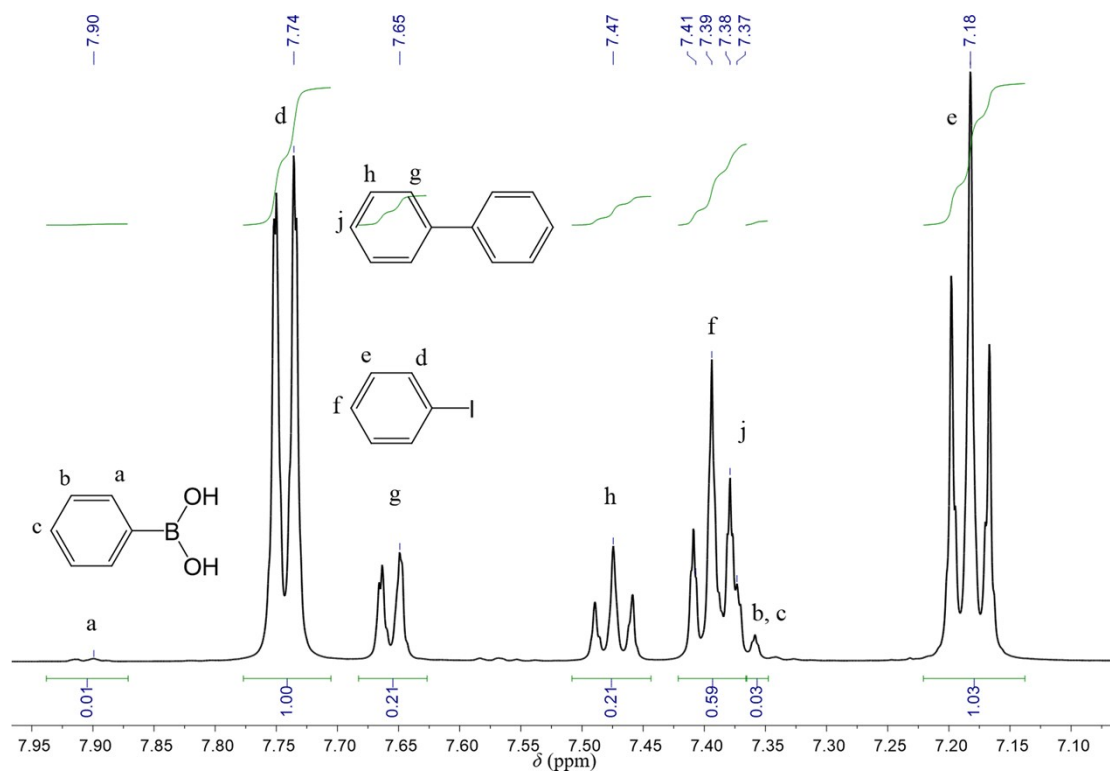

Fig. S17 Local amplification of <sup>1</sup>H NMR spectrum of unpurified reaction product.
